# Supplementary material for: Dietary calcium phosphate strongly impacts gut microbiome changes elicited by inulin and galacto-oligosaccharides consumption
Source: PubMed Central journal article supplement (PMC8567720; doi:10.1186/s40168-021-01148-0), 2021-11-04
Supplement: 40168_2021_1148_MOESM2_ESM.pdf [file 40168_2021_1148_MOESM2_ESM.pdf]

## **Supplementary Materials**

### **Dietary calcium phosphate strongly impacts gut microbiome changes elicited by inulin and galactooligosaccharides consumption**

J. Führen<sup>1</sup>, M. Schwalbe<sup>1</sup>, J. Boekhorst<sup>1</sup>, C. Rösch<sup>2</sup>, H.A. Schols<sup>2</sup>, M. Kleerebezem<sup>1</sup>

1: Host Microbe Interactomics Group, Wageningen University & Research, Wageningen, the  
Netherlands

2: Laboratory of Food Chemistry, Wageningen University & Research, Wageningen, the  
Netherlands

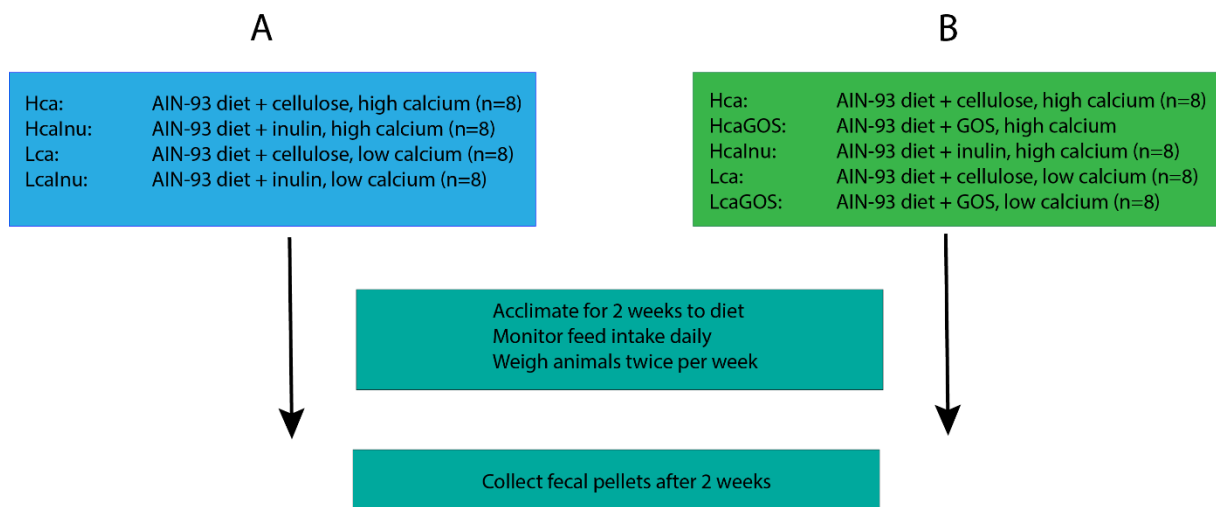

**Figure SF1. Experimental set up of animal trials.** Two independent animal trials with A) Hca, Hcalnu, Lca and Lcalnu diets and B) Hca, HcaGOS, Hcalnu, Lca and LcaGOS diets. All rats were acclimatized to the experimental diets fourteen days. Feed intake was monitored daily while animals were weighed twice per week. After the fourteen-day acclimatization period, fecal samples were collected for each rat.

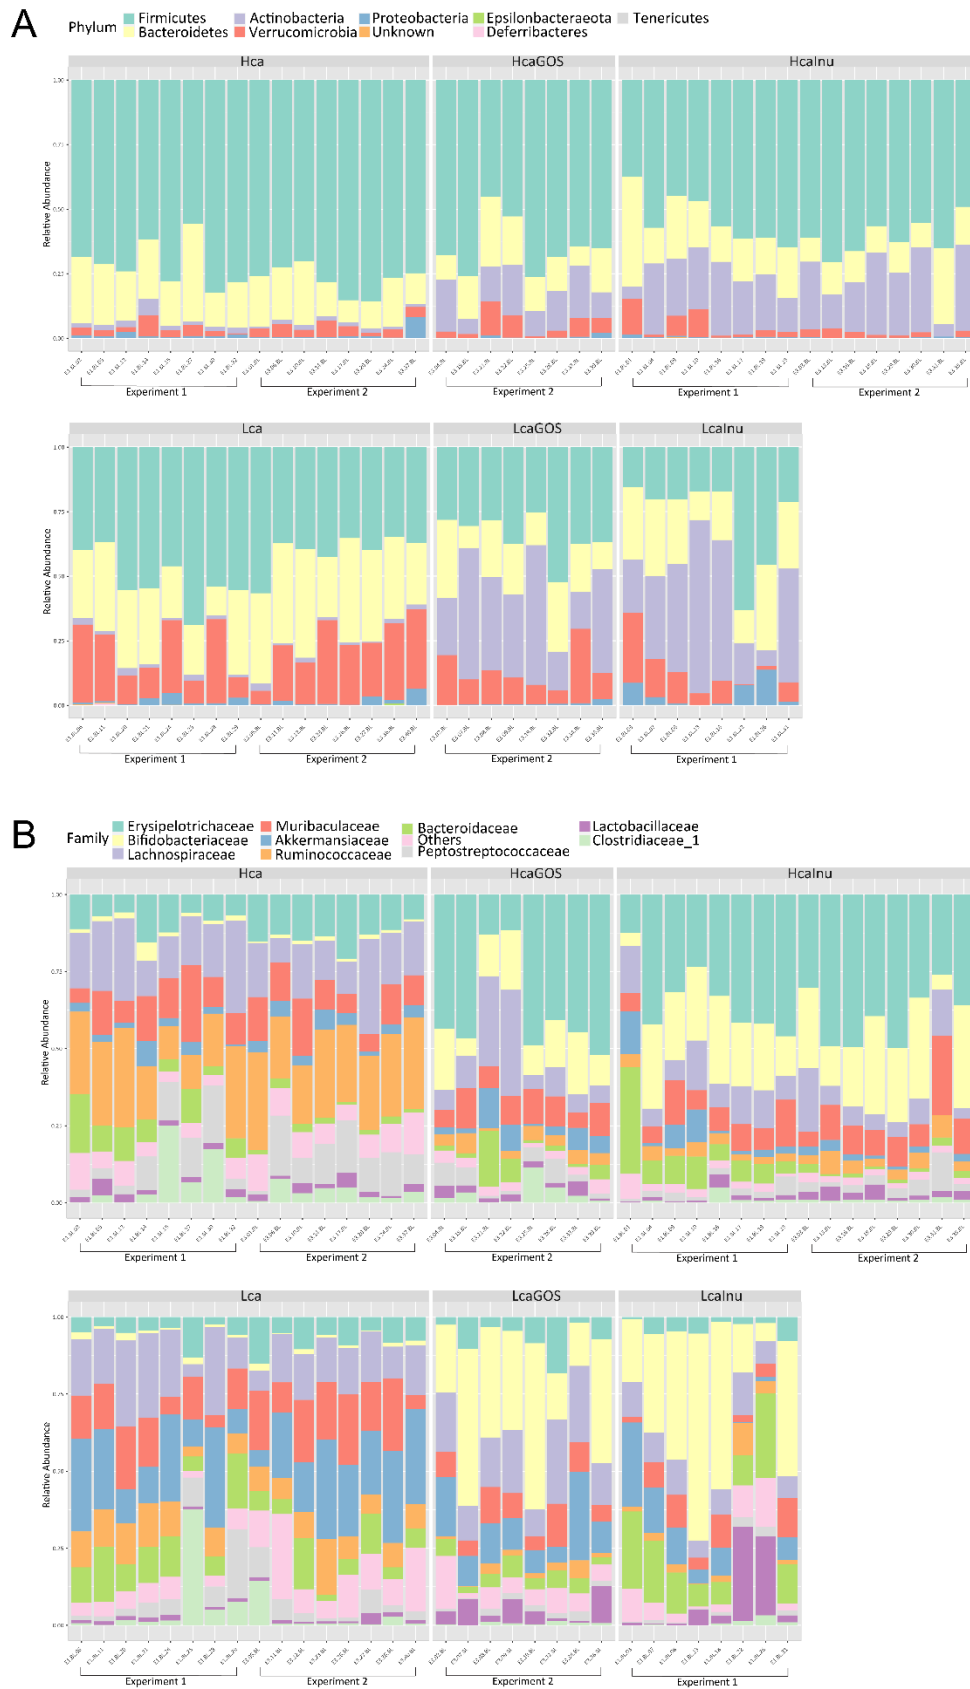

**Figure SF2. Individual composition plots.** Individual stacked bar plots of relative abundance of A) Phylum level and B) Family level.

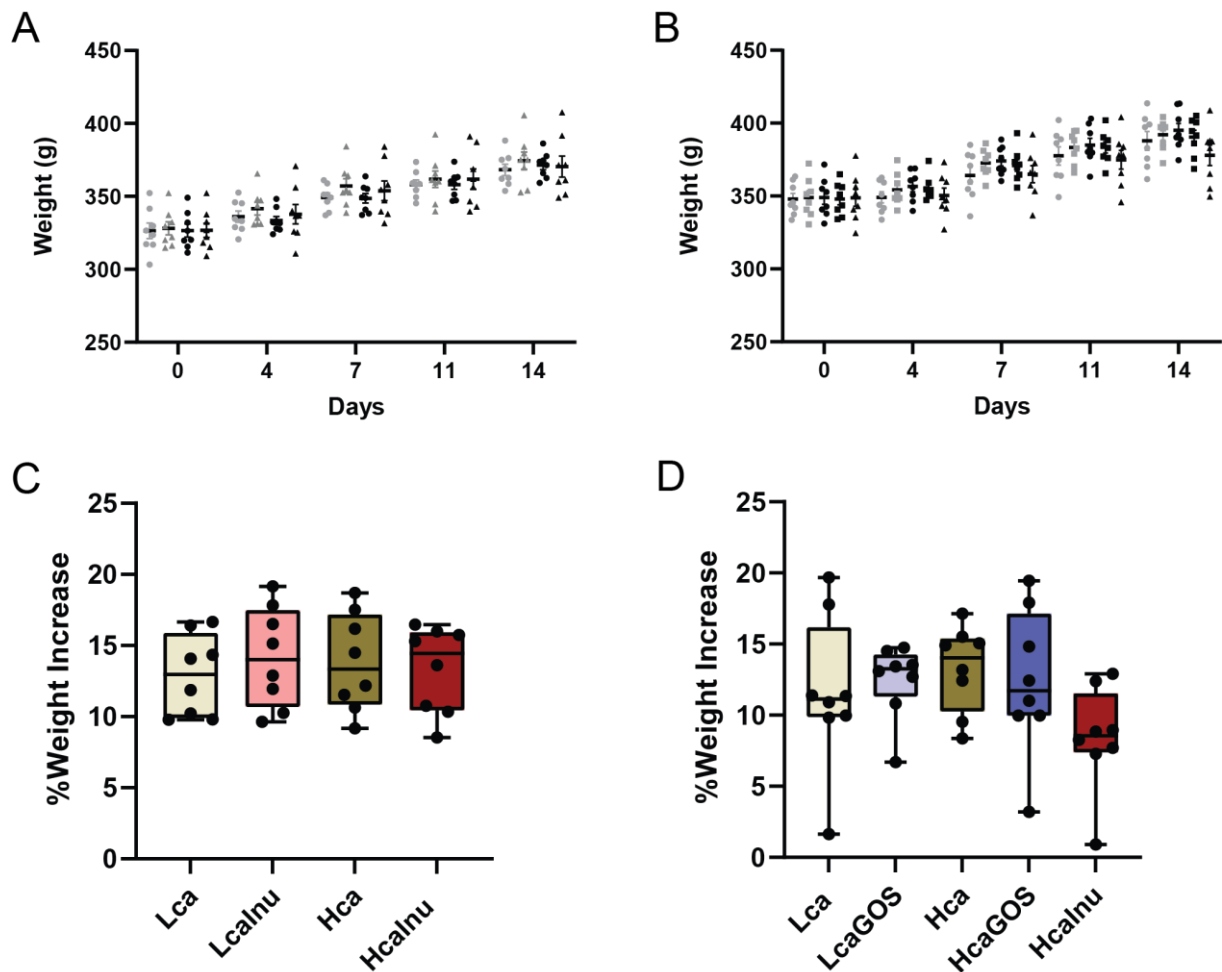

**Figure SF3. Rat weight over time.** Weight of individual rats and averages with SEM for each dietary group from day of arrival (day 0) to the day of fecal pellet collection (day 14) for A) Experiment 1, with rats on the Lca diet (grey circles), Lcalnu diet (grey triangles), Hca diet (black circles), and Hcalnu (black triangles), and B) Experiment 2, with rats on the Lca diet (grey circles), LcaGOS diet (grey squares), Hca diet (black circles), HcaGOS diet (black squares) and Hcalnu diet (black triangles). Boxplots of average and individual relative weight increase of each rat from day 14 compared to day 0 for C) Experiment 1, and D) Experiment 2. Differences in relative weight increase for each group were not significant.

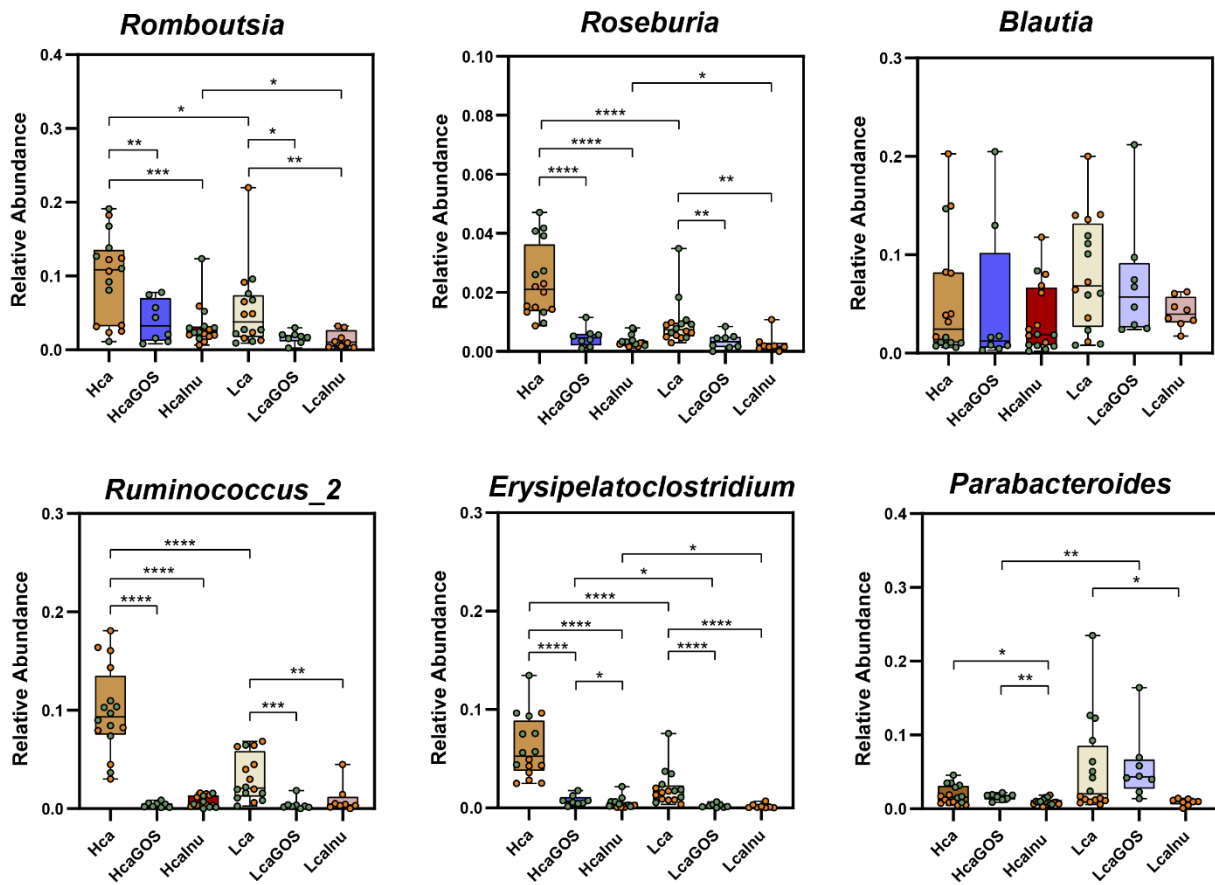

**Figure SF4. Univariate analysis of discriminant genera between dietary groups.** Relative abundance of the genera *Romboutsia*, *Roseburia*, *Blautia*, *Ruminococcus\_2*, *Erysipelatoclostridium* and *Parabacteroides* in each dietary group. Asterisks (\*) indicate significance after a two-sided Mann-Whitney t-test. \*:  $p < 0.05$ ; \*\*:  $p < 0.01$ ; \*\*\*:  $p < 0.001$ ; \*\*\*\*:  $p < 0.000$ . Samples derived from experiment 1 and experiment 2 (Figure 1F) are colored orange and green, respectively

**Supplemental Table ST1: Rata metadata and fecal organic acid levels.** Rat metadata used in both studies, including sample alias and accession numbers as deposited in ENA, study numbers corresponding to ENA submissions, experiment numbers corresponding to the current manuscript, rat numbers, dietary supplementation and fecal acid concentrations. CaPi: Calcium phosphate; Hca: high CaPi; Lca: low CaPi; Inu: inulin; GOS: galacto-oligosaccharides; Cl: cellulose; SA: succinic acid; LA: lactic acid; AA: acetic acid; PA: propionic acid; BA: butyric acid.

| Sample | alias | Rat Metadata                  |                  |       |       |      | Fecal organic acid concentrations<br>( $\mu\text{mol/g}$ wet weight feces) |        |       |        |        |       |
|--------|-------|-------------------------------|------------------|-------|-------|------|----------------------------------------------------------------------------|--------|-------|--------|--------|-------|
|        |       | Primary<br>Accession<br>(ENA) | Study #<br>(ENA) | Exp # | Rat # | CaPi | Supplement                                                                 | SA     | LA    | AA     | PA     | BA    |
| 1      |       | ERS5847309                    | 1                | 1     | 1     | Hca  | Inu                                                                        | 45.482 | 0.000 | 79.110 | 23.649 | 5.322 |
| 2      |       | ERS5847310                    | 1                | 1     | 2     | Hca  | Cl                                                                         | 0.000  | 3.236 | 26.874 | 3.462  | 3.562 |
| 3      |       | ERS5847311                    | 1                | 1     | 3     | Lca  | Inu                                                                        | 8.371  | 0.000 | 21.117 | 3.612  | 0.000 |
| 4      |       | ERS5847312                    | 1                | 1     | 4     | Hca  | Inu                                                                        | 0.000  | 5.020 | 46.425 | 2.092  | 0.000 |
| 5      |       | ERS5847313                    | 1                | 1     | 5     | Hca  | Cl                                                                         | 0.000  | 5.265 | 63.085 | 1.307  | 0.000 |
| 6      |       | ERS5847314                    | 1                | 1     | 6     | Lca  | Cl                                                                         | 0.000  | 0.000 | 23.172 | 1.950  | 0.000 |
| 7      |       | ERS5847315                    | 1                | 1     | 7     | Lca  | Inu                                                                        | 0.000  | 5.016 | 22.560 | 8.044  | 0.292 |
| 8      |       | ERS5847316                    | 1                | 1     | 8     | Lca  | Inu                                                                        | 7.464  | 2.804 | 26.414 | 12.243 | 1.825 |
| 9      |       | ERS5847317                    | 1                | 1     | 9     | Hca  | Inu                                                                        | 19.042 | 0.000 | 32.202 | 5.207  | 0.000 |
| 10     |       | ERS5847318                    | 1                | 1     | 10    | Hca  | Inu                                                                        | 7.053  | 8.370 | 61.863 | 6.573  | 1.666 |
| 11     |       | ERS5847319                    | 1                | 1     | 11    | Lca  | Cl                                                                         | 0.000  | 0.000 | 35.143 | 2.510  | 0.000 |
| 12     |       | ERS5847320                    | 1                | 1     | 12    | Hca  | Cl                                                                         | 0.000  | 0.000 | 26.875 | 0.000  | 0.000 |
| 13     |       | ERS5847321                    | 1                | 1     | 13    | Lca  | Inu                                                                        | 0.000  | 1.622 | 31.086 | 5.631  | 0.000 |
| 14     |       | ERS5847322                    | 1                | 1     | 14    | Hca  | Cl                                                                         | 0.000  | 3.781 | 38.146 | 2.845  | 0.000 |

|      |            |   |   |    |     |     |        |        |        |        |       |
|------|------------|---|---|----|-----|-----|--------|--------|--------|--------|-------|
| 15   | ERS5847323 | 1 | 1 | 15 | Hca | Cl  | 0.000  | 0.000  | 24.961 | 0.628  | 0.000 |
| 16   | ERS5847324 | 1 | 1 | 16 | Hca | Inu | 4.122  | 0.000  | 40.552 | 1.118  | 0.000 |
| 17   | ERS5847325 | 1 | 1 | 17 | Hca | Inu | 12.739 | 9.605  | 41.798 | 3.744  | 0.000 |
| 18   | ERS5847326 | 1 | 1 | 18 | Lca | Inu | 5.649  | 2.821  | 24.148 | 7.628  | 0.744 |
| 19   | ERS5847327 | 1 | 1 | 19 | Hca | Inu | 19.598 | 15.046 | 74.791 | 4.591  | 1.234 |
| 20   | ERS5847328 | 1 | 1 | 20 | Lca | Cl  | 0.000  | 4.319  | 48.436 | 4.288  | 0.000 |
| 21   | ERS5847329 | 1 | 1 | 21 | Lca | Cl  | 0.000  | 0.000  | 22.778 | 1.416  | 0.000 |
| 22   | ERS5847330 | 1 | 1 | 22 | Lca | Inu | 16.963 | 44.840 | 48.934 | 0.000  | 0.000 |
| 23   | ERS5847331 | 1 | 1 | 23 | Hca | Inu | 5.245  | 9.203  | 41.553 | 1.025  | 0.000 |
| 24   | ERS5847332 | 1 | 1 | 24 | Lca | Cl  | 5.160  | 0.000  | 17.650 | 0.918  | 0.000 |
| 25   | ERS5847333 | 1 | 1 | 25 | Lca | Cl  | 5.180  | 0.000  | 25.934 | 2.536  | 0.489 |
| 26   | ERS5847334 | 1 | 1 | 26 | Lca | Inu | 12.550 | 0.000  | 71.328 | 2.369  | 0.000 |
| 27   | ERS5847335 | 1 | 1 | 27 | Hca | Cl  | 7.583  | 0.000  | 33.176 | 1.296  | 0.000 |
| 28   | ERS5847336 | 1 | 1 | 28 | Lca | Cl  | 5.484  | 3.912  | 25.429 | 1.905  | 0.000 |
| 29   | ERS5847337 | 1 | 1 | 29 | Lca | Cl  | 14.843 | 6.167  | 58.308 | 2.973  | 0.000 |
| 30   | ERS5847338 | 1 | 1 | 30 | Hca | Cl  | 3.239  | 3.636  | 30.296 | 0.743  | 0.000 |
| 31   | ERS5847339 | 1 | 1 | 31 | Lca | Inu | 28.974 | 7.531  | 35.982 | 10.753 | 1.895 |
| 32   | ERS5847340 | 1 | 1 | 32 | Hca | Cl  | 7.134  | 0.000  | 27.705 | 1.063  | 0.000 |
| 3.01 | ERS5847673 | 3 | 2 | 1  | Hca | Cl  | 0.000  | 0.000  | 33.026 | 1.174  | 0.000 |
| 3.02 | ERS5847674 | 3 | 2 | 2  | Lca | GOS | 7.356  | 0.000  | 32.517 | 10.256 | 0.496 |
| 3.03 | ERS5847675 | 3 | 2 | 3  | Hca | Inu | 14.703 | 7.908  | 53.037 | 1.754  | 0.000 |
| 3.04 | ERS5847676 | 3 | 2 | 4  | Hca | GOS | 2.024  | 1.528  | 33.718 | 3.114  | 0.000 |
| 3.05 | ERS5847677 | 3 | 2 | 5  | Lca | Cl  | 3.240  | 3.839  | 24.362 | 2.646  | 1.533 |
| 3.06 | ERS5847678 | 3 | 2 | 6  | Hca | Cl  | 8.730  | 4.464  | 30.961 | 0.921  | 0.000 |
| 3.07 | ERS5847679 | 3 | 2 | 7  | Lca | GOS | 5.188  | 9.155  | 39.244 | 4.383  | 0.000 |

|      |            |   |   |    |     |     |        |        |        |        |        |
|------|------------|---|---|----|-----|-----|--------|--------|--------|--------|--------|
| 3.08 | ERS5847680 | 3 | 2 | 8  | Lca | GOS | 11.891 | 0.000  | 38.675 | 16.344 | 2.619  |
| 3.09 | ERS5847681 | 3 | 2 | 9  | Lca | GOS | 4.234  | 6.431  | 33.198 | 4.840  | 0.000  |
| 3.10 | ERS5847682 | 3 | 2 | 10 | Hca | Cl  | 0.000  | 0.000  | 30.493 | 1.296  | 0.000  |
| 3.11 | ERS5847683 | 3 | 2 | 11 | Lca | Cl  | 0.000  | 0.000  | 30.832 | 5.275  | 0.000  |
| 3.12 | ERS5847684 | 3 | 2 | 12 | Lca | Cl  | 0.000  | 0.000  | 55.766 | 0.690  | 0.000  |
| 3.13 | ERS5847685 | 3 | 2 | 13 | Hca | Inu | 20.259 | 15.628 | 63.038 | 3.680  | 10.531 |
| 3.14 | ERS5847686 | 3 | 2 | 14 | Hca | Cl  | 0.000  | 0.000  | 31.775 | 0.382  | 0.000  |
| 3.15 | ERS5847687 | 3 | 2 | 15 | Hca | GOS | 14.333 | 12.846 | 49.577 | 3.569  | 1.519  |
| 3.16 | ERS5847688 | 3 | 2 | 16 | Hca | Inu | 17.098 | 11.216 | 58.538 | 1.307  | 0.746  |
| 3.17 | ERS5847689 | 3 | 2 | 17 | Hca | Cl  | 1.682  | 2.525  | 18.375 | 0.499  | 0.000  |
| 3.18 | ERS5847690 | 3 | 2 | 18 | Hca | Inu | 0.000  | 6.308  | 57.194 | 7.131  | 0.708  |
| 3.19 | ERS5847691 | 3 | 2 | 19 | Lca | GOS | 6.015  | 7.224  | 31.448 | 5.835  | 0.391  |
| 3.20 | ERS5847692 | 3 | 2 | 20 | Hca | Cl  | 0.000  | 0.000  | 23.545 | 1.180  | 0.000  |
| 3.21 | ERS5847693 | 3 | 2 | 21 | Hca | GOS | 78.088 | 0.000  | 23.727 | 8.143  | 0.685  |
| 3.22 | ERS5847694 | 3 | 2 | 22 | Hca | GOS | 26.765 | 9.950  | 57.340 | 3.977  | 0.000  |
| 3.23 | ERS5847695 | 3 | 2 | 23 | Lca | Cl  | 3.435  | 2.823  | 28.498 | 1.929  | 0.000  |
| 3.24 | ERS5847696 | 3 | 2 | 24 | Hca | Cl  | 2.026  | 2.843  | 30.094 | 0.913  | 0.000  |
| 3.25 | ERS5847697 | 3 | 2 | 25 | Hca | GOS | 3.947  | 14.359 | 55.200 | 1.757  | 0.751  |
| 3.26 | ERS5847698 | 3 | 2 | 26 | Lca | Cl  | 4.133  | 2.447  | 32.680 | 2.963  | 0.000  |
| 3.27 | ERS5847699 | 3 | 2 | 27 | Lca | Cl  | 9.949  | 3.159  | 36.871 | 3.535  | 0.000  |
| 3.28 | ERS5847700 | 3 | 2 | 28 | Hca | GOS | 6.205  | 5.664  | 42.349 | 4.002  | 0.000  |
| 3.29 | ERS5847701 | 3 | 2 | 29 | Hca | Inu | 16.924 | 19.564 | 50.231 | 1.560  | 1.837  |
| 3.30 | ERS5847702 | 3 | 2 | 30 | Hca | Inu | 9.295  | 22.108 | 48.901 | 2.450  | 0.719  |
| 3.31 | ERS5847703 | 3 | 2 | 31 | Hca | Inu | 3.226  | 5.243  | 56.269 | 3.870  | 0.000  |
| 3.32 | ERS5847704 | 3 | 2 | 32 | Lca | GOS | 0.000  | 4.856  | 35.653 | 6.856  | 1.573  |



|      |            |   |   |    |     |     |        |        |        |        |       |
|------|------------|---|---|----|-----|-----|--------|--------|--------|--------|-------|
| 3.33 | ERS5847705 | 3 | 2 | 33 | Hca | GOS | 0.000  | 7.324  | 61.161 | 2.528  | 0.423 |
| 3.34 | ERS5847706 | 3 | 2 | 34 | Lca | GOS | 15.712 | 3.981  | 33.879 | 11.123 | 0.000 |
| 3.35 | ERS5847707 | 3 | 2 | 35 | Hca | Inu | 14.811 | 12.086 | 85.387 | 4.105  | 1.892 |
| 3.36 | ERS5847708 | 3 | 2 | 36 | Lca | Cl  | 3.428  | 0.000  | 15.097 | 1.751  | 0.000 |
| 3.37 | ERS5847709 | 3 | 2 | 37 | Hca | Cl  | 0.000  | 2.941  | 28.170 | 1.013  | 0.000 |
| 3.38 | ERS5847710 | 3 | 2 | 38 | Lca | GOS | 4.395  | 4.880  | 31.204 | 2.564  | 0.000 |
| 3.39 | ERS5847711 | 3 | 2 | 39 | Hca | GOS | 3.798  | 8.205  | 70.679 | 4.185  | 0.000 |
| 3.40 | ERS5847712 | 3 | 2 | 40 | Lca | Cl  | 4.050  | 0.000  | 0.620  | 0.000  | 0.000 |

---
